# Supplementary material
Source: publisher site journal article supplement (https://www.dovepress.com/article/498221)
Supplement: Supplementary file 1 [file get_supplementary_file.php]

## **Supplemental** Table **1**: Validation Performance Metrics For the Various Death Date Gaps of the Composite Death Data and NDI

|  | | -60 to 60 Days | | -60 to 30 Days | | -30 to 30 Days | | -15 to 15 Days | | -7 to 7 Days |
| --- | --- | --- | --- | --- | --- | --- | --- | --- | --- | --- |
| Sensitivity | 89.0%  (88.6%, 89.4%) | | 88.9%  (88.5%, 89.3%) | | 88.8%  (88.4%, 89.2%) | | 87.5%  (87.1%, 87.9%) | | 82.4%  (81.4%, 82.8%) | |
| Specificity | 89.1%  (88.6%, 89.6%) | | 89.1%  (88.6%, 89.6%) | | 89.1%  (88.6%, 89.6%) | | 89.1%  (88.6%, 89.6%) | | 89.1%  (88.6%, 89.6%) | |
| PPV | 93.4%  (93.1%, 93.7%) | | 93.4%  (93.1%, 93.7%) | | 93.4%  (93.1%, 93.7%) | | 93.3%  (93.0%, 93.6%) | | 92.9%  (92.6%, 93.2%) | |
| NPV | 82.4%  (81.8%, 83.0%) | | 82.3%  (81.7%, 82.9%) | | 82.2%  (81.6%, 82.8%) | | 80.5%  (79.9%, 81.1%) | | 74.5%  (73.9%, 75.2%) | |

NDI: National death index; PPV: Positive predictive value; NPV: Negative predictive value
